# Supplementary material for: Why fly the extra mile? Latitudinal trend in migratory fuel deposition rate as driver of trans‐equatorial long‐distance migration
Source: PubMed Central journal article supplement (PMC5058532; doi:10.1002/ece3.2388), 2016-08-25

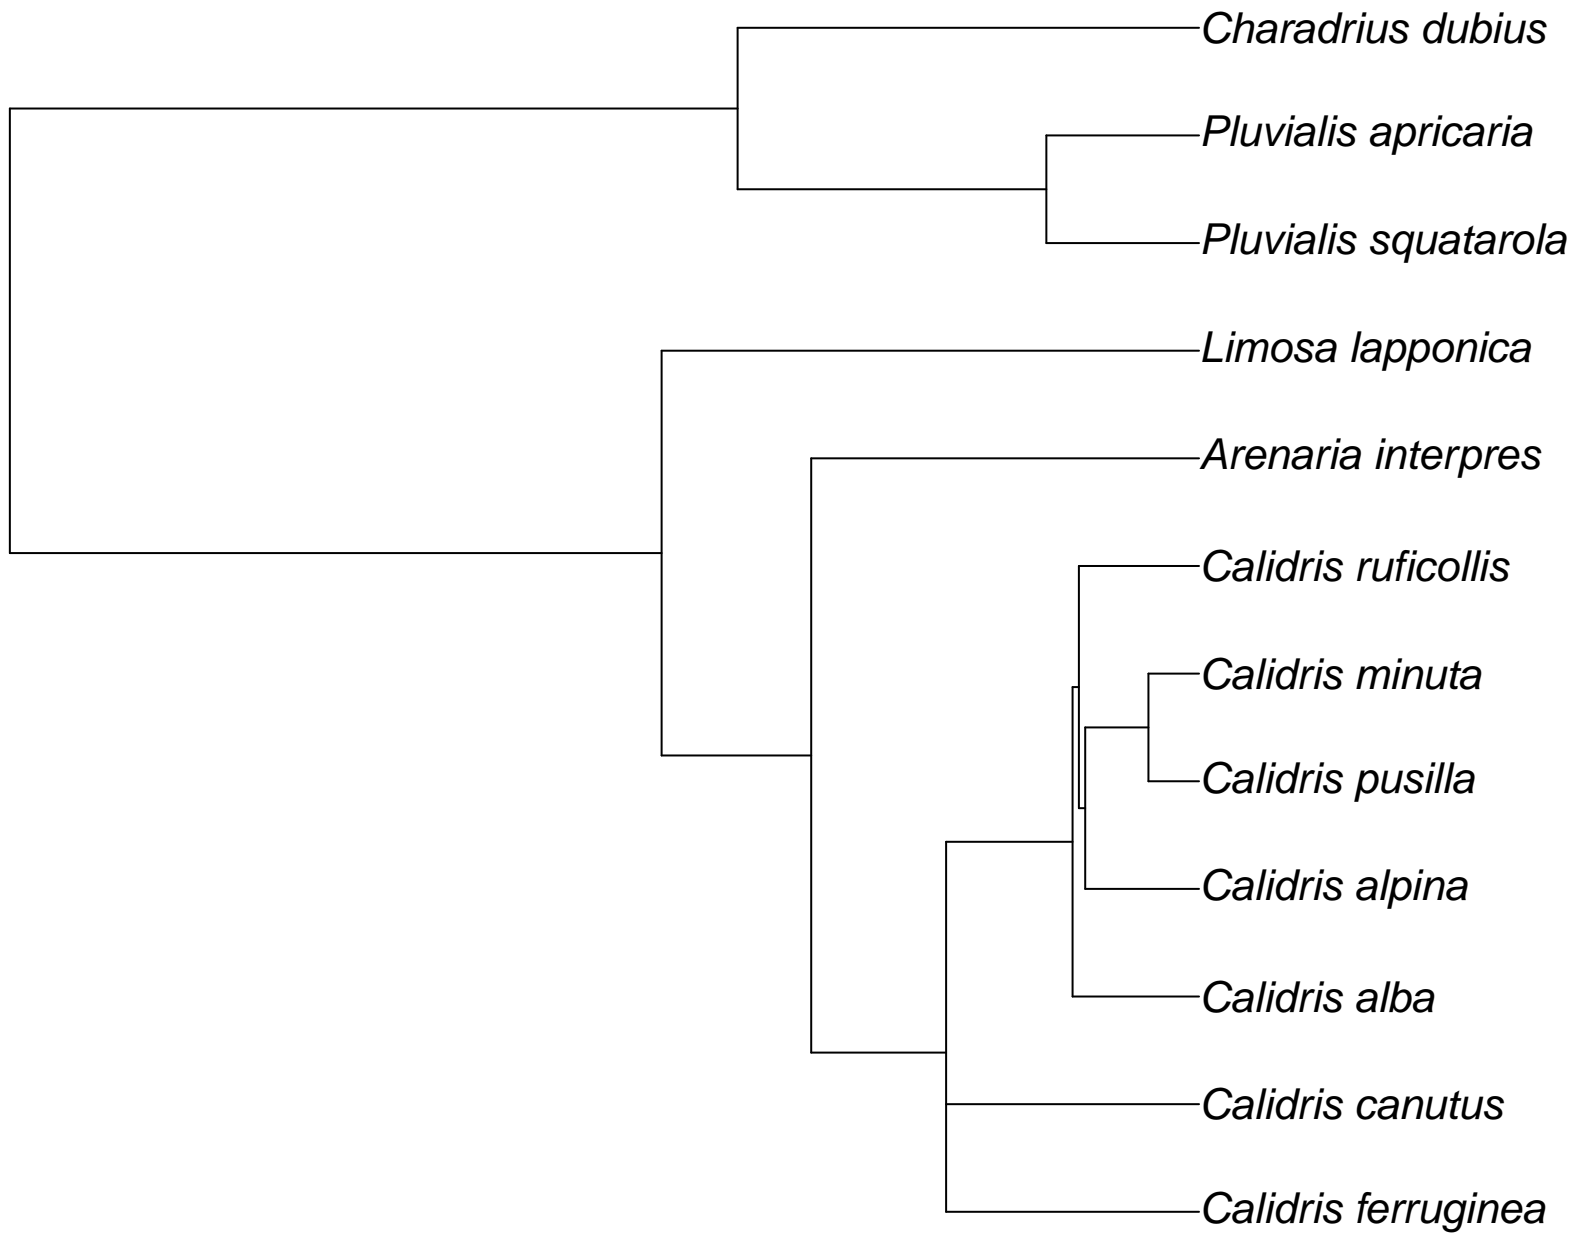

Supplement: ECE3-6-6616-s001.pdf [file ECE3-6-6616-s001.pdf]
